# Supplementary material
Source: PubMed Central journal article supplement (PMC2733321)

# Figure S1

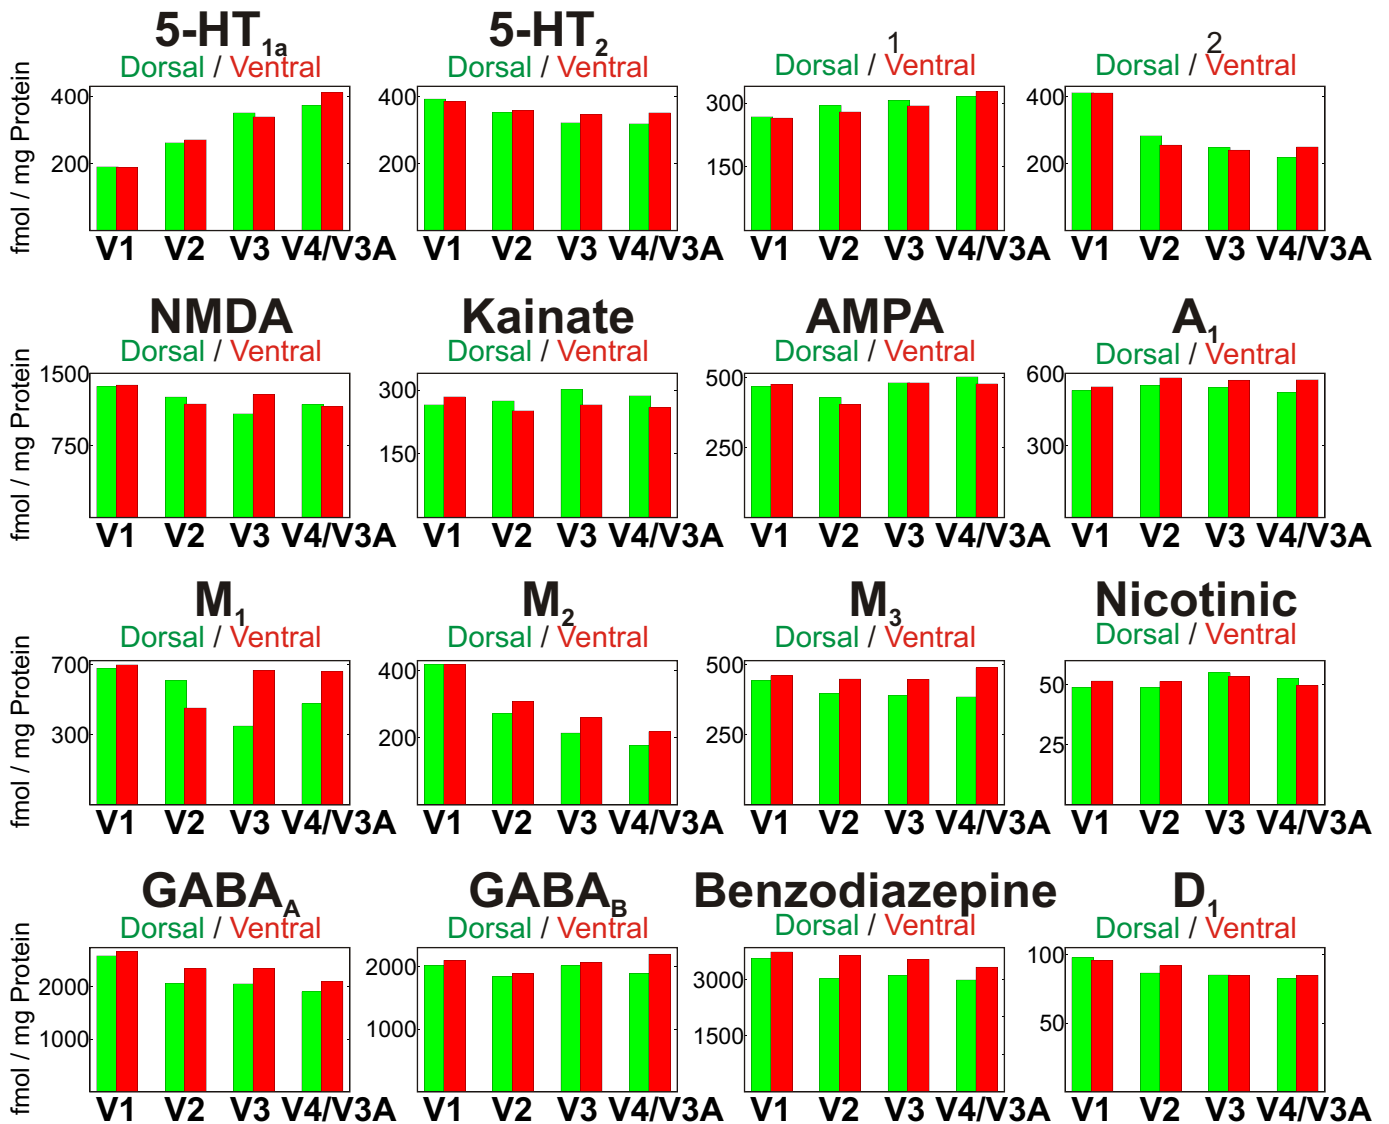

# Figure S2

## Striate cortex

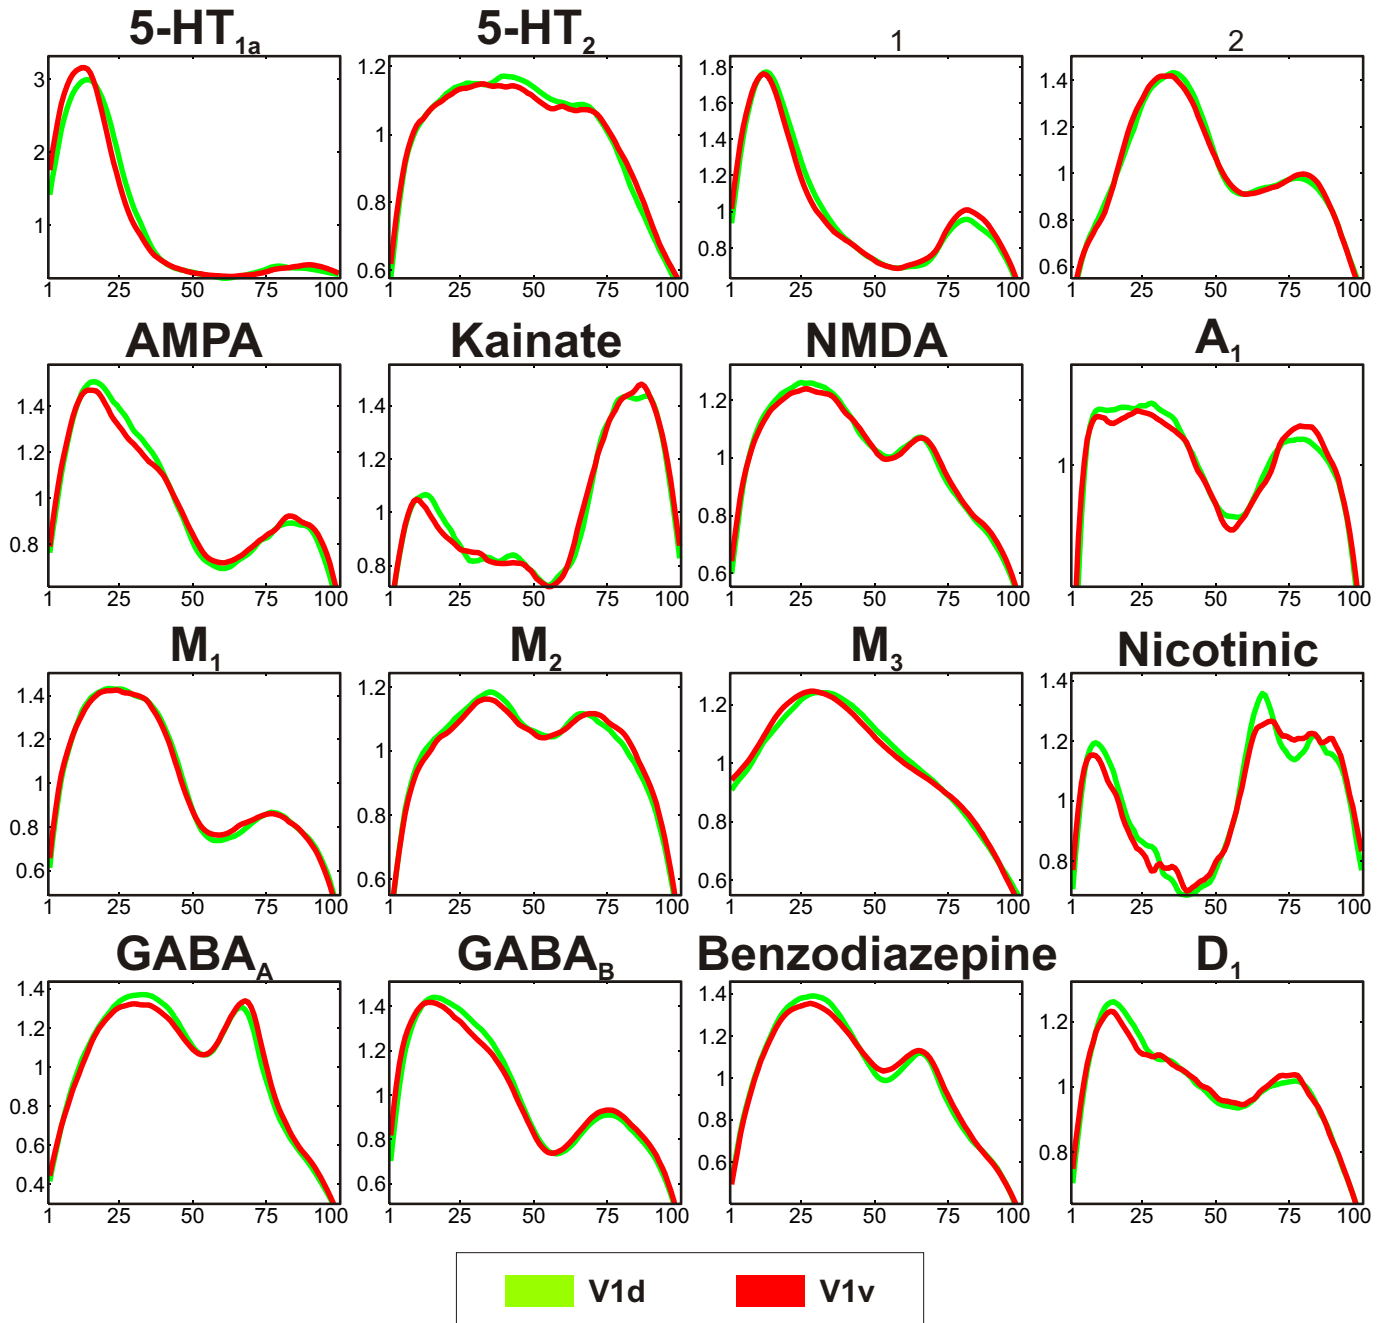

# Figure S3

## Extrastriate cortex

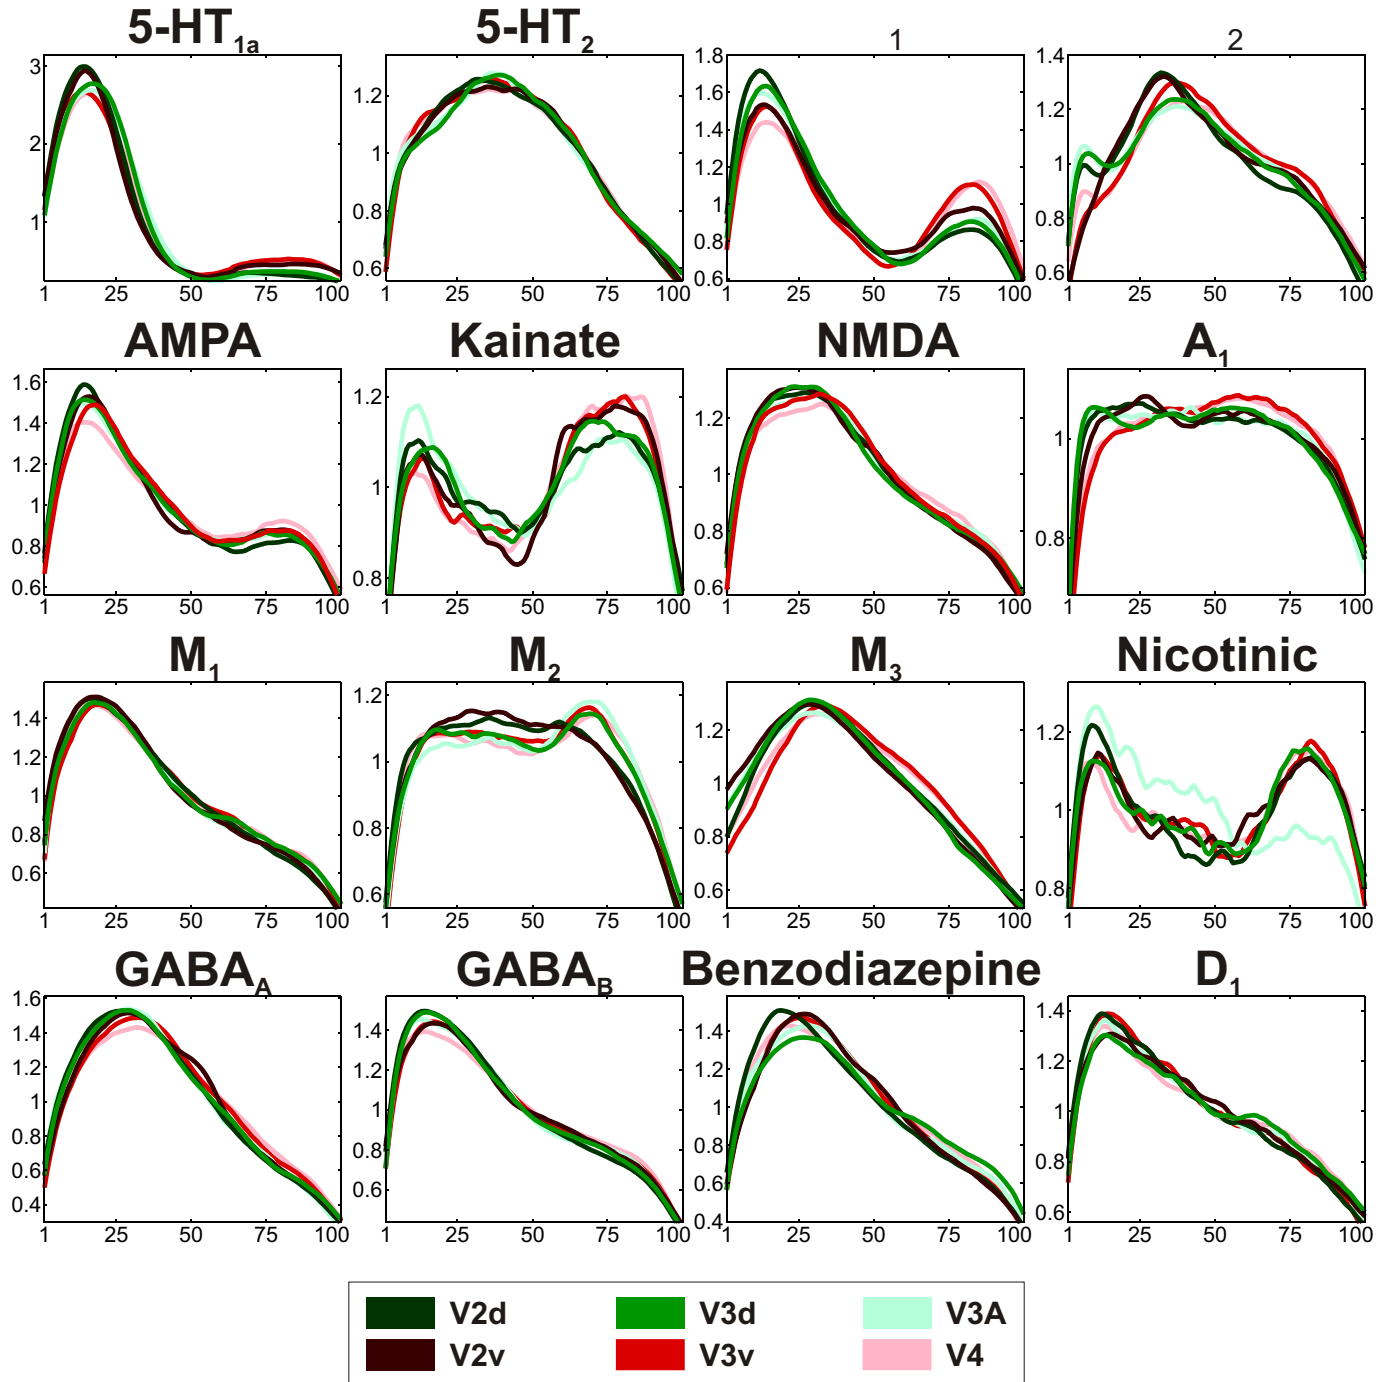

Supplement: bhn024_1.pdf [file bhn024_1.pdf]
